# Supplementary material for: Rapid synthesis of FeS nanoparticles encapsulated with nanoporous graphitic shells for high performance sodium- and lithium-ion batteries
Source: Royal Society of Chemistry journal article supplement (doi:10.1039/d1se00722j), 2021-01-01
Supplement: d1se00722j1.pdf [file d1se00722j1.pdf]

## Supplementary Data

### Rapid Synthesis of FeS Nanoparticles Encapsulated with Nanoporous Graphitic Shells for High Performance Sodium and Lithium-Ion Batteries

*Zhao Min Sheng\**, *Na Na Li*, *Qing Mei Xu*, *Cheng Yang Hong*, *Si Yuan Wu*, *Cheng*

*Kang Chang*, *Sheng Han\** and *Chang Ming Li\**

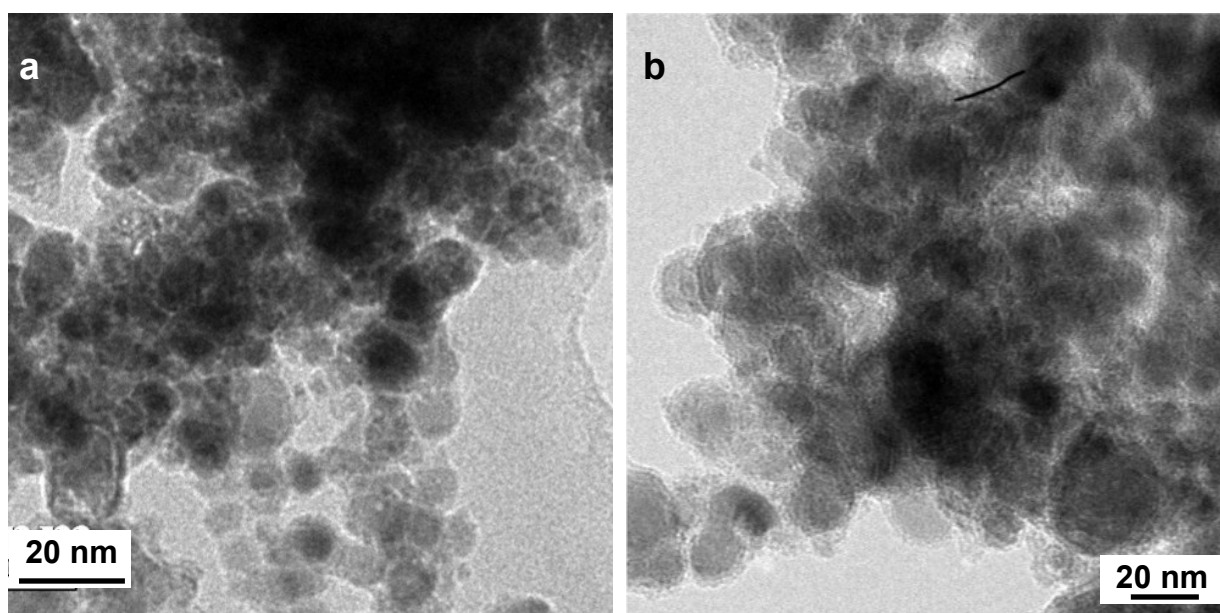

Figure S1. TEM images of FeS@SDS700 (a) and FeS@SDS1100 (b).

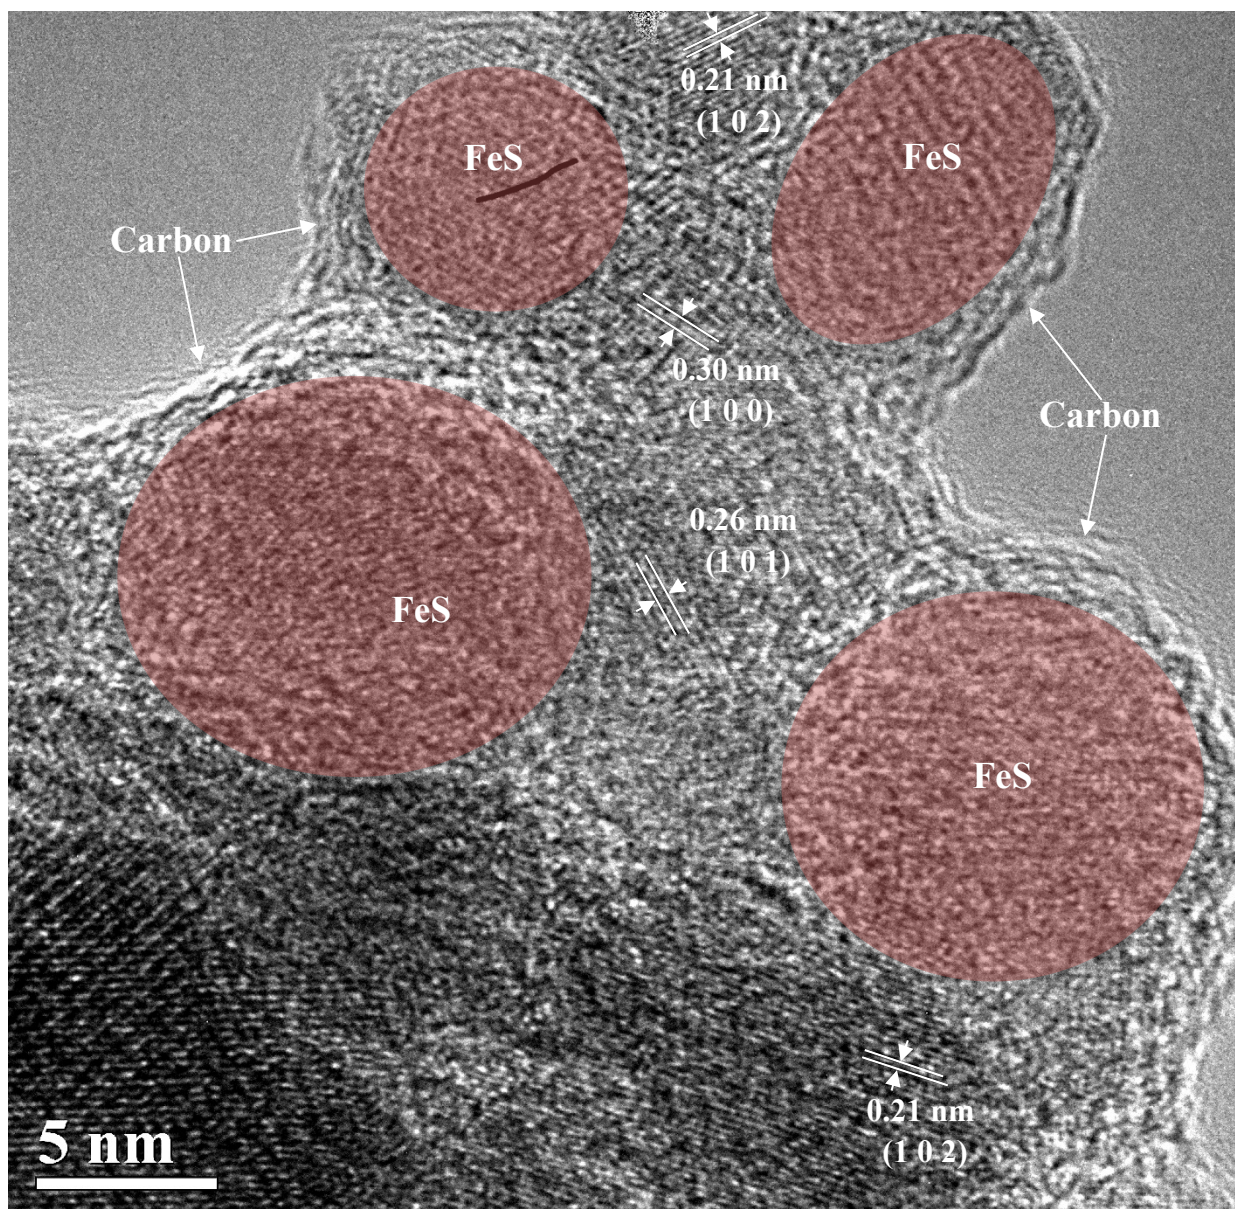

Figure S2. Microstructure analysis of FeS@PWS900 according to the HRTEM image.

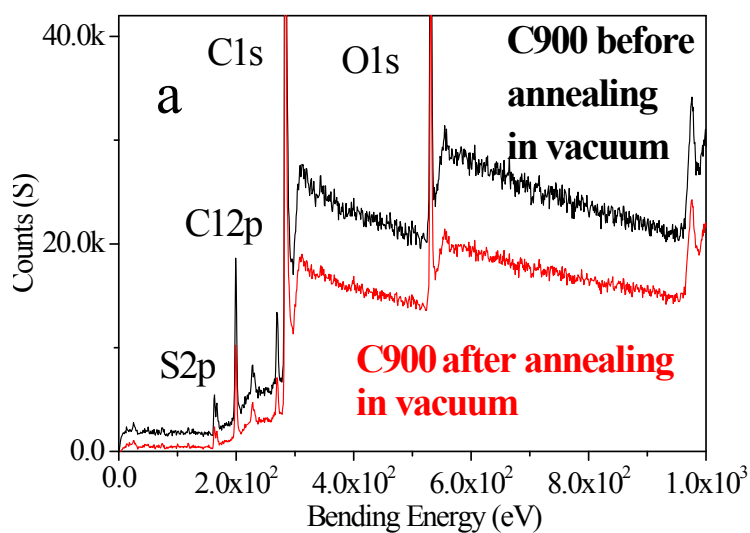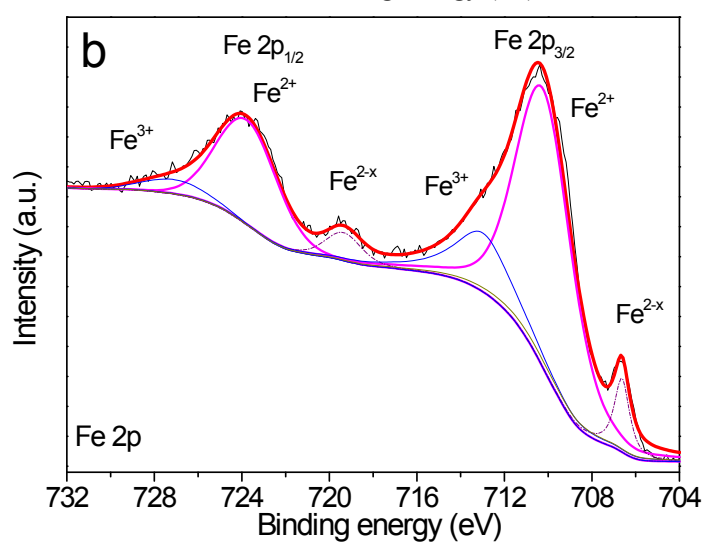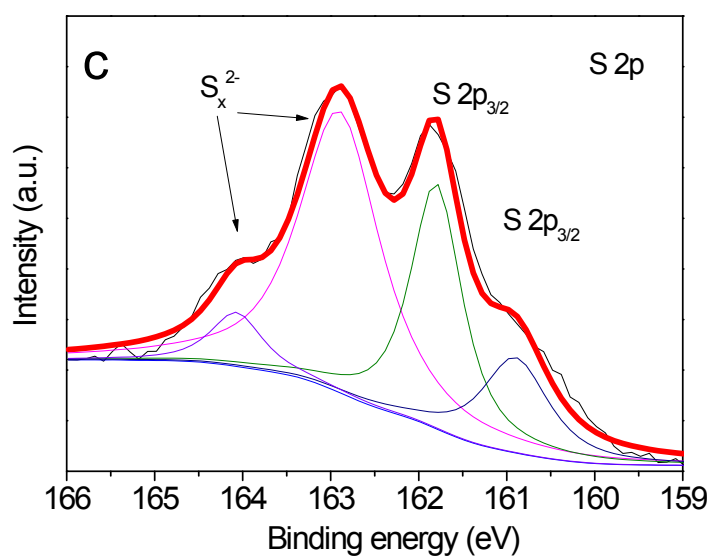

Figure S3. (a) X-ray photoelectron spectroscopy (XPS) spectra of S-doped nanocages before (acid-treating) and after (vacuum-heating) removing doping structure, Fe 2p (b) and S 2p (c) XPS spectra of FeS@PWS900.

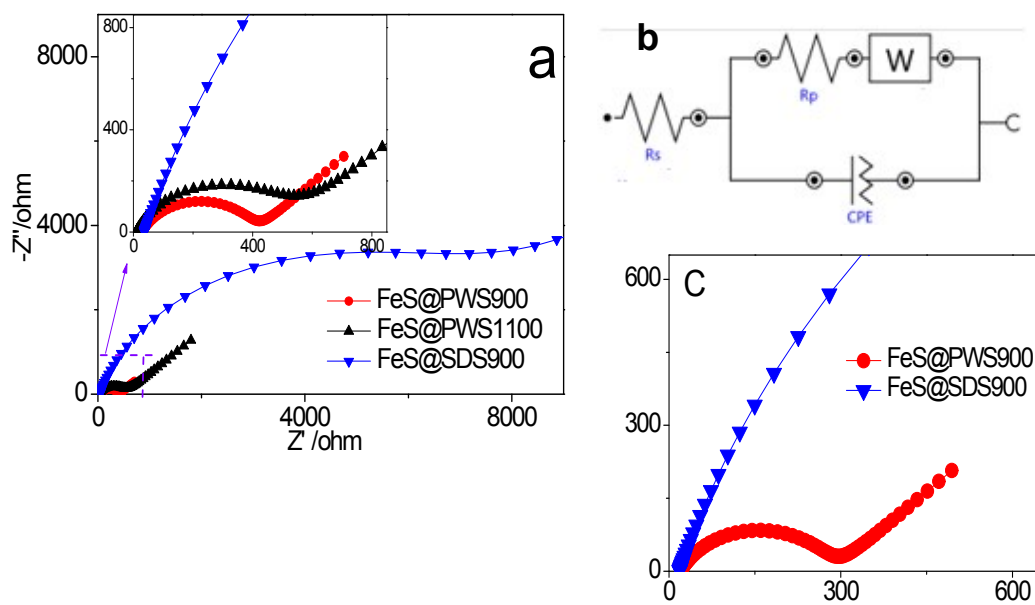

Figure S4. (a) Nyquist plots of the prepared FeS@C-based anodes and (b) the common equivalent circuit for SIBs; (c) Nyquist plots of the prepared FeS@C-based anodes for LIBs.
